# Supplementary material
Source: publisher site journal article supplement (https://www.dovepress.com/article/278179)
Supplement: Supplementary file 1 [file get_supplementary_file.php]

**Supplementary material: Training Coverage Assessment Tool**

**General background**

1. **Zone ___________________ Woreda _____________**
2. **Questionnaire ID----------------------------**
3. **Name of health facility ________________________________**
4. **Type of health facility: Public/Private/NGO______________**

**Part One: Provider related factors**

| **S.NO** | **Question** | **Response** | **Remark** |
| --- | --- | --- | --- |
| **101** | Sex | 1. **Male** 2. **Female** |  |
| **102** | Profession | **_____________________** |  |
| **103** | Highest educational status | **_____________________** |  |
| **104** | Service year as health professional | **__________ years** |  |
| **105** | Position(Extra duty) in the facility (if any) | **_____________________** |  |
| **106** | Currently working unit | **_____________________** |  |
| **107** | Are you currently working on area that you got training? | 1. **Yes** 2. **No** |  |
| **108** | A. For how many days you are giving service per week on trained area? | **________ days per week** |  |
|  | B. Totally, For how long did you provide service as per the training in appropriate Service area/unit/point of care?(from the training date up to now) | **_____Months ____Years** |  |
| **109** | Are you happy by providing the service on area where you got training? | 1. **Yes** 2. **No** |  |
| **110** | What factors made you happy while providing the service on area where you got training? | 1. **_______________** 2. **__________________** 3. **__________________** |  |
| **111** | Have you ever been mentored since the training? | 1. **Yes** 2. **No** |  |
| **112** | Where have you got training?  (List types of training you took) | 1. **Hawassa University ISTC** 2. **Wolaita Sodo University ISTC** 3. **Arba Minch University ISTC** 4. **Mizan Tepi University ISTC** 5. **Others** |  |
| **113** | Were the trainers provided training appropriately? | 1. Yes 2. No |  |
| **114** | Were training environment conducive for training? | 1. Yes 2. No |  |
| **115** | If no to Q 114 what were the problems? | 1. __________________ 2. _________________ |  |
| **116** | Is your working environment favourable to implement the training as per guidelines/as per training protocol at your organization?? | 1. Yes 2. No |  |
| **117** | If your answer is No. for Q 116 what are the challenges you experienced in service delivery? | 1. Lack of confidence 2. Low client flow 3. Current position not relevant to the service 4. Space problem 5. Man power shortage 6. Equipment/supply shortage 7. Provider support tools 8. Staff rotation 9. Others____________ |  |
| **118** | How do you solved? | ______________________________________________________________ |  |
| **119** | Would you recommend in-service training to other service providers? | A. Yes  B. No |  |

**Part two: Health facility related questions**

| **S.No** | **Questions** | | **Response** | **Remark** |
| --- | --- | --- | --- | --- |
| **201** | Is there trainee selection procedure in your facility? | | 1. **Yes** 2. **No** |  |
| **202** | If yes for Q 201 | 1. Mention the procedure | **__________________________________________** |  |
| 1. Was trainee selection minute documented? | 1. Yes 2. No |  |
| **203** | Do training manuals present at working place for reference? | | 1. Yes 2. No |  |
| **204** | Does all trained person working in area where he/she trained? | | 1. Yes 2. No |  |
| **205** | If not to Q204, why? | | ____________________________________________ |  |
| **206** | Would trainee request to put training materials at working unit? | | 1. **Yes** 2. **No** |  |
| **207** | Do the trainees give orientation for other non-trained staffs after taking training? | | 1. **Yes** 2. **No** |  |
| **208** | Is there rotation program of staffs in your facility? | | 1. **Yes** 2. **No** |  |
| **209** | If yes for Q 208 | At what interval would they rotate? | **_______________ months** |  |
| How would you treat the trained staff case? | **___________________________________________** |  |
| **210** | Before sending the trainee for the training is there the trend of agreement in between the trainee and facility? | | 1. Yes 2. No |  |
| **211** | If yes for Q210 | 1. For how long does the agreement | _________ years |  |
| 1. Does the agreement documents available? | 1. Yes 2. No |  |

**Part Three: Status of assigned trained health care providers at point of service**

| **SNO** | **Service area** | **Total number of trained Health Care Professionals** | **No of Health Care Professionals currently working on the program** | **No of Health Care Professionals working on the program but not trained** |
| --- | --- | --- | --- | --- |
| **1** | **Maternal and Child Health Unit** |  |  |  |
| 1.1 | Basic Prevention from Mother to Child Transmission (PMTCT) |  |  |  |
| 1.2 | PMTCT Refresher |  |  |  |
| 1.3 | Early Infant Diagnosis |  |  |  |
| 1.4 | Mother Support Group for Mentor mothers |  |  |  |
| 1.5 | Mother Support Group for site coordinators |  |  |  |
| 1.6 | PMTCT Mentorship |  |  |  |
| 1.7 | PMTCT Cohort Monitoring |  |  |  |
| 1.8 | Gender Based Violence |  |  |  |
| 1.9 | Case Based Surveillance & recency testing |  |  |  |
| **2** | **Antiretroviral Therapy (ART) Unit** |  |  |  |
| 2.1 | Basic ART |  |  |  |
| 2.2 | ART Pharmacy |  |  |  |
| 2.3 | Adherence Supporter |  |  |  |
| 2.4 | Deltougravir Rollout & ART Optimization |  |  |  |
| 2.5 | Key Population |  |  |  |
| 2.6 | Partner Notification & Index case testing |  |  |  |
| 2.7 | HIV self-testing |  |  |  |
| 2.8 | Key Population for navigators |  |  |  |
| 2.9 | Nutritional Assessment Counselling and Support (NACS) |  |  |  |
| 2.10 | HIV and Mental health integration for ART providers |  |  |  |
| 2.11 | Mental health for adherences case managers |  |  |  |
| 2.12 | Adolescent and paediatrics psychosocial support and disclosure |  |  |  |
| 2.13 | Case Based Surviellanc & recency testing |  |  |  |
| 2.14 | Clinical system Mentorship |  |  |  |
| **3** | **Out Patient Department (OPD)** |  |  |  |
| 3.1 | Provider-Initiated HIV Testing and Counselling (PITC) |  |  |  |
| 3.2 | Sexually Transmitted Infection (STI) |  |  |  |
| 3.3 | Case Based Surveillance & recency testing |  |  |  |
| **4** | **Voluntary Counselling and Testing (VCT) Unit** |  |  |  |
| 4.1 | Basic HIV Testing Service (HTS) |  |  |  |
| 4.1 | Case based Surveillance & recency testing |  |  |  |
| **5** | **Tuberculosis (TB) Unit** |  |  |  |
| 5.1 | TB Leprosy and HIV |  |  |  |
| 5.2 | Case Based Surveillance & recency testing |  |  |  |
| **6** | **Laboratory** |  |  |  |
| 6.1 | ART lab Monitoring |  |  |  |
| 6.2 | Dried Blood Sample (DBS)collection |  |  |  |
| 6.3 | Strengthening Laboratory Management towards Accreditation (SLMTA) I |  |  |  |
| 6.4 | Strengthening Laboratory Management towards Accreditation (SLMTA) II |  |  |  |
| 6.5 | Strengthening Laboratory Management towards Accreditation (SLMTA) III |  |  |  |
| 6.6 | Specimen referral linkage |  |  |  |
| 6.7 | Lab Biosafety training |  |  |  |
| 6.8 | Lab Quality Management |  |  |  |
| 6.9 | HIV testing algorism |  |  |  |
| 6.10 | Quality control and method validation |  |  |  |
| 6.11 | Case based Surveillance & recency testing |  |  |  |
| **7** | **Cross cutting** |  |  |  |
| 7.1 | Monitoring and Evaluation related training |  |  |  |
| 7.2 | Continuous quality improvement (CQI) |  |  |  |

**Data collectors name ___________________________ Date _________________ Sign___________**
